# Supplementary material
Source: publisher figshare collection journal article supplement (https://acs.figshare.com/ndownloader/files/3845428)
Supplement: Supplementary file 1 [file 3845428]

Supporting information

## **A Low-Surface-Area Hard Carbon Anode for Na-Ion Batteries via Graphene Oxide as a Dehydration Agent**

*Wei Luo*<sup>†</sup>, *Clement Bommier*<sup>†</sup>, *Zelang Jian*<sup>†</sup>, *Xin Li*<sup>†</sup>, *Rich Carter*<sup>†</sup>, *Sean Vail*<sup>‡</sup>, *Yuhao Lu*<sup>‡</sup>,  
*Jong-Jan Lee*<sup>†</sup>, *Xiulei Ji*<sup>†\*</sup>

<sup>†</sup> Department of Chemistry, Oregon State University, Corvallis, OR, USA, 97331

<sup>‡</sup> Sharp Laboratories of America, Inc., Camas, WA, USA, 98607

\*Correspondence to: david.ji@oregonstate.edu (Xiulei Ji)

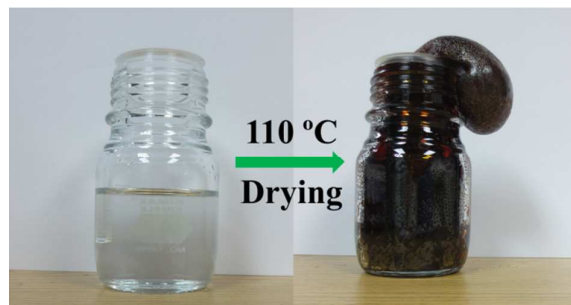

Figure S1. Digital pictures for a pure sucrose aqueous solution before and after dried at 110 °C.

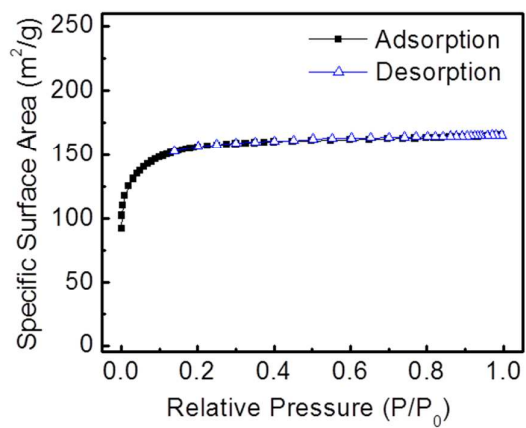

Figure S2. N<sub>2</sub> adsorption/desorption isotherm of HC-S.
